# Supplementary material for: Construction of mordenite catalysts with superacid sites for enhanced dimethyl ether carbonylation
Source: Royal Society of Chemistry journal article supplement (doi:10.1039/d5cy00068h), 2025-01-01
Supplement: d5cy00068h1.pdf [file d5cy00068h1.pdf]

## **Construction of Mordenite Catalysts with Superacid Sites for Enhanced Dimethyl Ether Carbonylation**

Yunduo Liu <sup>a, b</sup>, Ji Qi <sup>b, c \*</sup>, Kongying Zhu <sup>d</sup>, Hu Liu <sup>a</sup>, Xuhong Liu <sup>a</sup>, Minxing Wang <sup>a</sup>, Mei-Yan Wang <sup>a</sup>, Jing Lv <sup>a, b \*</sup>, Shouying Huang <sup>a, b</sup> and Xinbin Ma <sup>a</sup>

<sup>a</sup> *Key Laboratory for Green Chemical Technology of Ministry of Education, Haihe Laboratory of Sustainable Chemical Transformations, School of Chemical Engineering and Technology, Tianjin University, Tianjin, 300350, China*

<sup>b</sup> *Ningbo Key Laboratory of Green Petrochemical Carbon Emission Reduction Technology and Equipment, Zhejiang Institute of Tianjin University, Ningbo, 315201, Zhejiang, China*

<sup>c</sup> *Institute of Molecular Plus, Tianjin University, Tianjin, 300072, China*

<sup>d</sup> *Nuclear Magnetic Resonance Test Center, Tianjin University, Tianjin, 300350, China*

Correspond authors: Ji Qi (j\_qi@tju.edu.cn); Jing Lv (muddylj@tju.edu.cn)

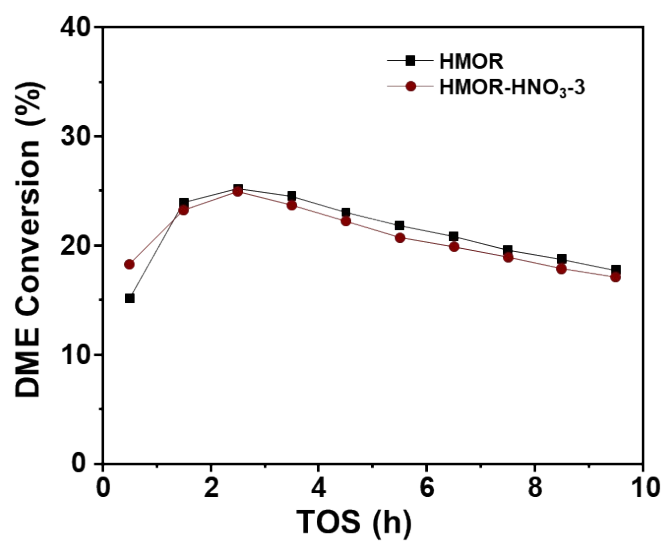

Figure S1. The DME conversion of HMOR and HMOR-HNO<sub>3</sub>-3.

Reaction condition: T=200 °C, P=1.5 MPa, 6000 h<sup>-1</sup>.

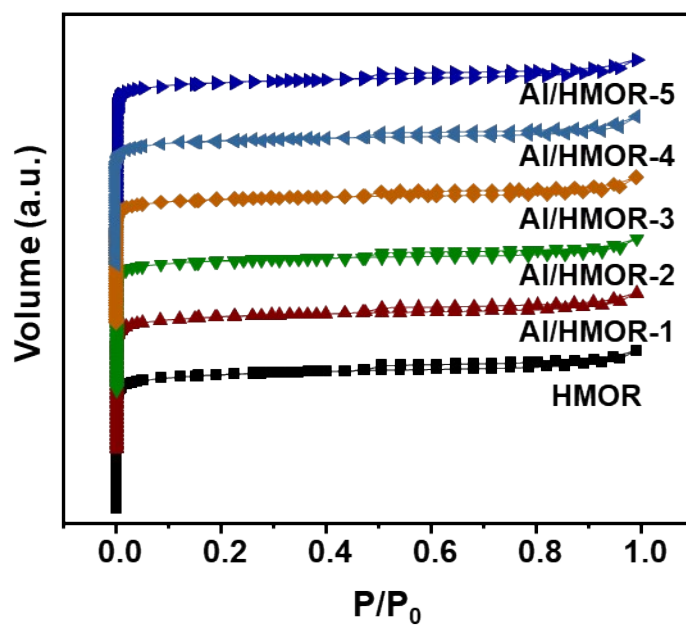

Figure S2. N<sub>2</sub> adsorption-desorption isotherms of the different samples

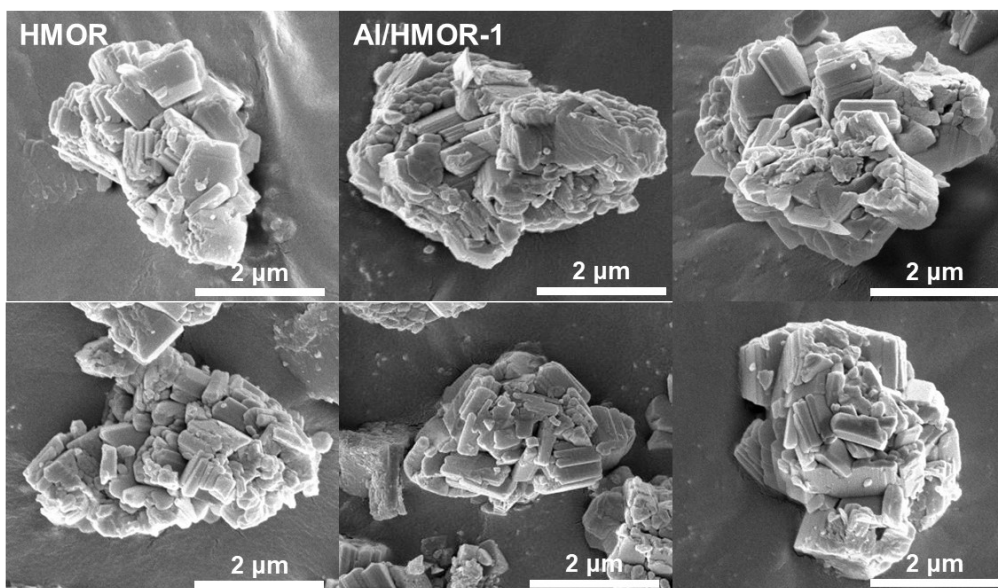

Figure S3. SEM images of the different samples

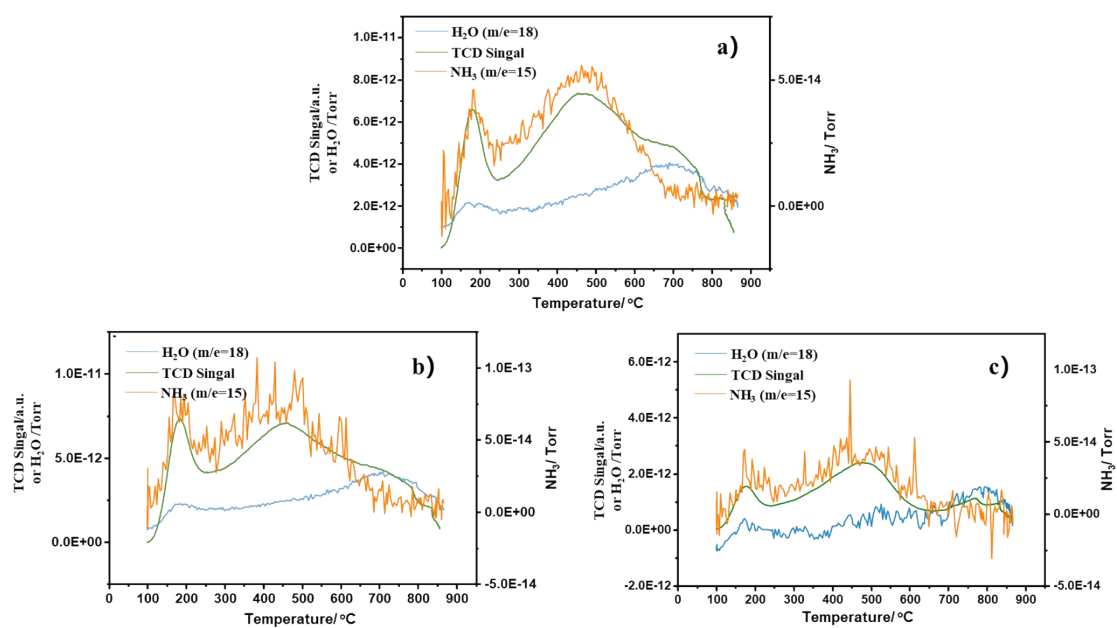

Figure S4. The signal of mass spectrometry of a) HMOR, b) Al/HMOR-3, c) Al/HMOR-5.
